# Supplementary material
Source: publisher figshare collection journal article supplement (https://acs.figshare.com/ndownloader/files/5548085)
Supplement: Supplementary file 1 [file 5548085]

# SUPPORTING INFORMATION

## **Probing Distinct Fullerene Formation Processes from Carbon Precursors of Different Sizes and Structures**

Jong Yoon Han,<sup>†</sup> Tae Su Choi,<sup>†,‡</sup> Soyoung Kim,<sup>‡,§</sup> Jong Wha Lee,<sup>†,‡</sup> Yoonhoo Ha,<sup>||</sup> Kwang  
Seob Jeong,<sup>†</sup> Hyungjun Kim,<sup>||</sup> Hee Cheul Choi,<sup>‡,§</sup> and Hugh I. Kim<sup>\*,†</sup>

<sup>†</sup>Department of Chemistry, Research Institute for Natural Sciences, Korea University, Seoul,  
02841, Republic of Korea

<sup>‡</sup>Department of Chemistry, Pohang University of Science and Technology (POSTECH), Pohang,  
37673, Republic of Korea

<sup>§</sup>Center for Artificial Low Dimensional Electronic Systems, Institute for Basic Science (IBS),  
Pohang 37673, Republic of Korea

<sup>||</sup> Graduate School of Energy, Environment, Water, and Sustainability (EEWS), Korea Advanced  
Institute of Science and Technology, Daejeon, 34141, Republic of Korea

\* To whom correspondence should be addressed: E-mail: [hughkim@korea.ac.kr](mailto:hughkim@korea.ac.kr)

## Table of Contents

| Title           | Contents                                                                                   | Page |
|-----------------|--------------------------------------------------------------------------------------------|------|
| Supporting Text |                                                                                            | S-3  |
| Figure S1       | AFM and FE-SEM image of multilayer graphene (MLG)                                          | S-4  |
| Figure S2       | CCS calibration curve obtained using poly-DL-alanine calibrants.                           | S-5  |
| Figure S3       | Collision cross section (CCS) values of carbon cluster ions from various carbon precursors | S-6  |
| Table S1        | Theoretical CCS values of structural models in Figure 2                                    | S-7  |
| Figure S4       | UV/Vis absorption spectra of triphenylene precursor and C <sub>60</sub>                    | S-8  |
| Figure S5       | IM-MS spectra of ions generated from small hydrocarbons                                    | S-9  |
| Figure S6       | Mobility-separated mass spectrum of +3 charged carbon cluster ions                         | S-10 |
| References      |                                                                                            | S-11 |

## Experimental Section

**Atomic Force Microscopy (AFM) and Field Emission Scanning Electron Microscopy (FE-SEM).** For analysis of multi-layered graphene (MLG), MLG samples dispersed in a solution of water and 2-propanol (50:50, v/v) were deposited onto a silicon wafer. AFM experiments were performed at the National Institute for Nanomaterials Technology (NIST; Pohang, Korea) with a VEECO Dimension 3100 atomic force microscope. FE-SEM experiments were performed at NIST using a JEOL JSM-7401F scanning electron microscope.

**UV/Vis spectroscopy.** The solutions of triphenylene (Tri) and C<sub>60</sub> were prepared by dissolving them in toluene. Then, the UV/Vis absorption of prepared solutions were analyzed using Shimadzu UV-1800 (Shimadzu, Japan) spectrophotometer.

## Discussion

### Penetration depth of 355 nm laser in multi-walled carbon nanotubes.

The intensity of the 355 nm laser as a function of the depth of graphite is estimated by equation (1).

$$\frac{I}{I_0} = e^{-\alpha z} \quad (1)$$

where  $\alpha = \frac{4\pi k}{\lambda}$ ,  $\lambda=355$  nm, and  $k=1.3$ , which is the extinction coefficient of graphite<sup>1</sup>. The  $z$  values at  $\frac{I}{I_0} = \frac{1}{e}$  is defined as the penetration depth of laser. This equation was previously shown to provide good estimate of laser penetration depth in graphite, similar to the experimental values<sup>2</sup>. Based on equation (1), the penetration depth of the 355 nm laser through graphite was calculated to be ~22 nm. Because the interval length between the layers in multi-walled carbon nanotubes (MWNT) (0.34 nm) is same as graphite, we assumed that the extinction coefficient of MWNT is equal to that of graphite.

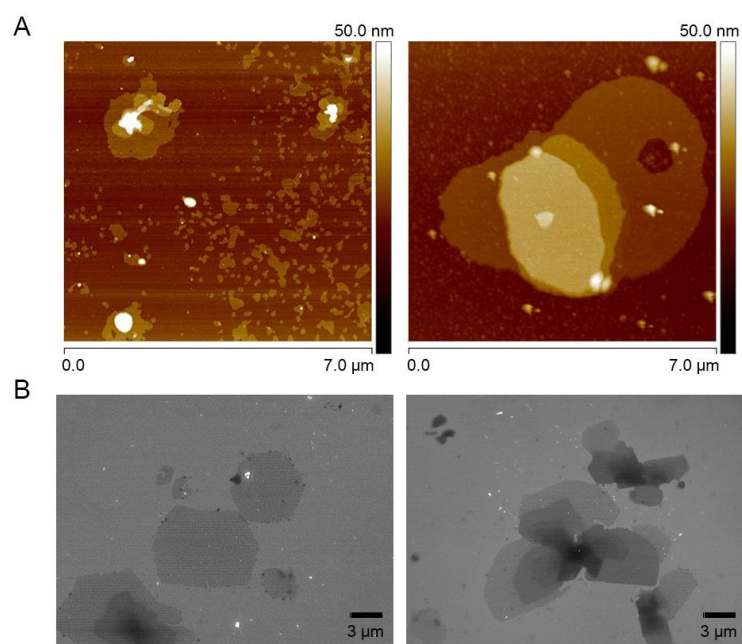

**Figure S1.** (A) AFM images, and (B) FE-SEM images of MLG used in this study. Thickness of each MLG sheet was  $\sim 5$  nm, indicating that it is multi-layered. The lateral dimensions were in the order of micrometers.

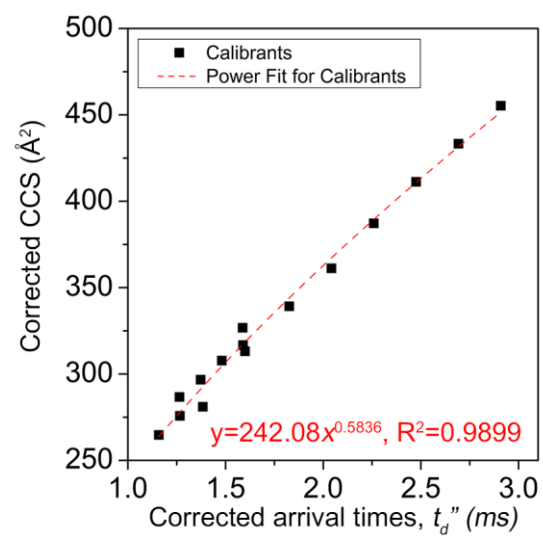

**Figure S2.** Collision cross-section (CCS) calibration curve obtained using poly-DL-alanine as calibrants.

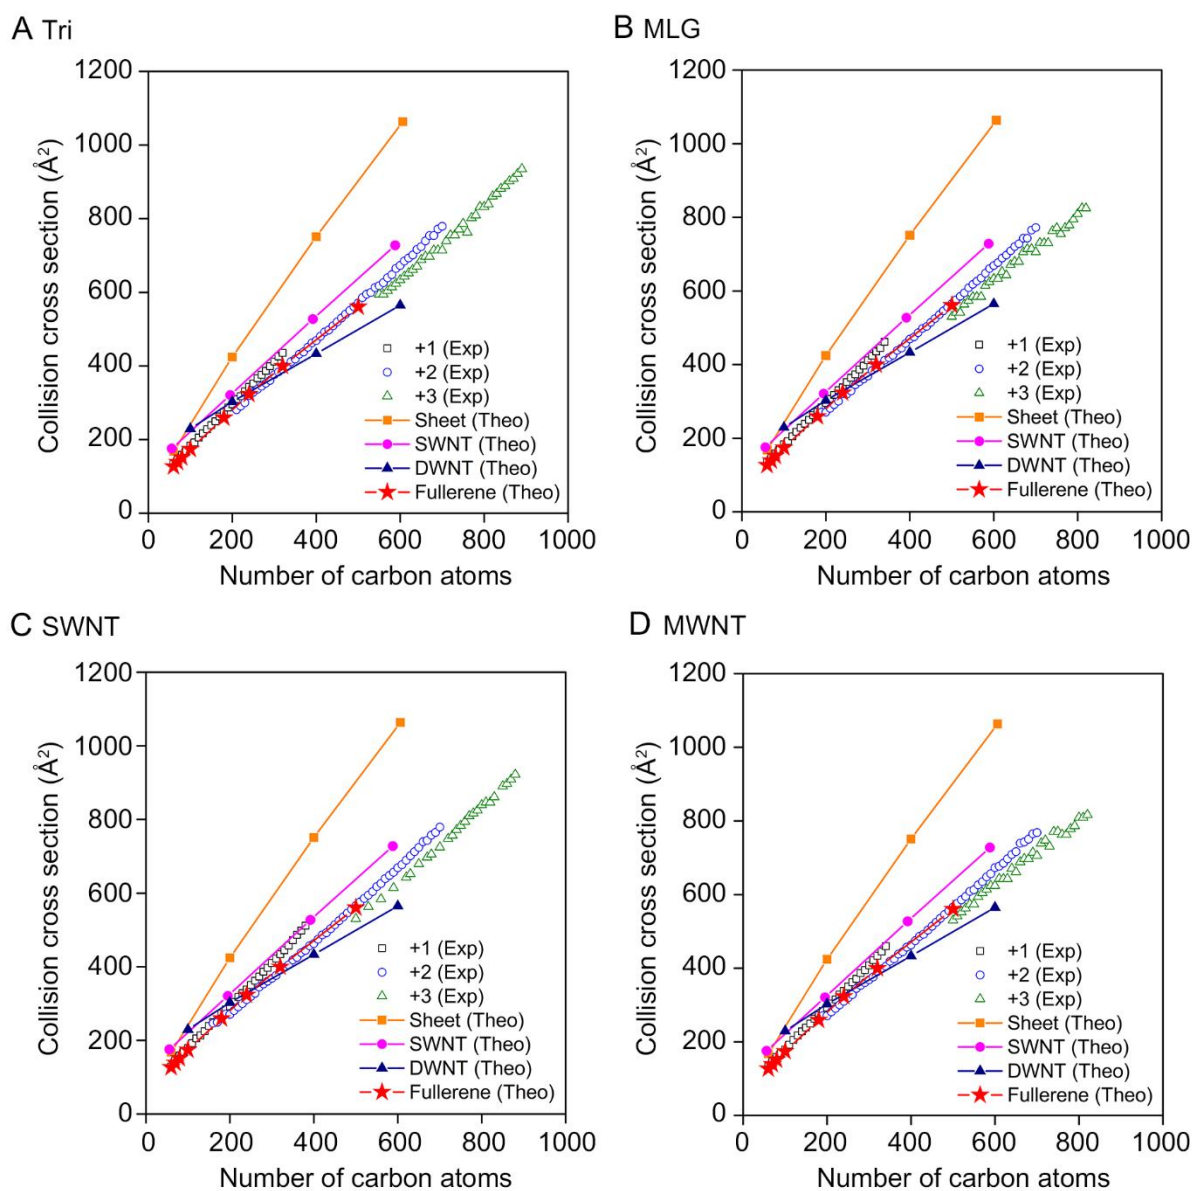

**Figure S3.** Correlation between the number of carbon atoms and collision cross-section (CCS) areas of carbon clusters from (A) triphenylene (Tri), (B) multi-layered graphene (MLG), (C) single-walled carbon nanotube (SWNT), and (D) multi-walled carbon nanotube (MWNT). The peaks in the spectra which have ratios,  $S/N > 3$ , are considered. Experimental CCS values of carbon clusters were compared with the theoretical CCS values of various models of +1 charge state. Detailed description of the models is provided in Figure 2B.

**Table S1.** Theoretical CCS of the structural models presented in Figure 2. The CCS values ( $\text{\AA}^2$ ) of the models were obtained for +1 and +2 charge state. The models with +2 charge show slightly increased theoretical CCS values. Due to insignificant difference between the values, we adopt the theoretical CCS values of the +1 charge state for plotting Figures 2 and S3.

| MODEL     |                  | +1      | +2      |
|-----------|------------------|---------|---------|
| Sheet     | C <sub>60</sub>  | 167.64  | 170.72  |
|           | C <sub>200</sub> | 424.33  | 425.21  |
|           | C <sub>400</sub> | 751.07  | 752.28  |
|           | C <sub>600</sub> | 1063.40 | 1063.80 |
| SWNT      | C <sub>56</sub>  | 175.60  | 178.29  |
|           | C <sub>195</sub> | 320.81  | 322.46  |
|           | C <sub>392</sub> | 527.21  | 528.76  |
|           | C <sub>588</sub> | 727.77  | 728.46  |
| DWNT      | C <sub>100</sub> | 229.59  | 232.23  |
|           | C <sub>200</sub> | 302.57  | 304.96  |
|           | C <sub>400</sub> | 433.36  | 434.54  |
|           | C <sub>600</sub> | 564.99  | 566.00  |
| Fullerene | C <sub>60</sub>  | 126.73  | 132.00  |
|           | C <sub>70</sub>  | 138.76  | 144.33  |
|           | C <sub>80</sub>  | 151.33  | 156.74  |
|           | C <sub>100</sub> | 174.13  | 172.79  |
|           | C <sub>180</sub> | 259.15  | 266.27  |
|           | C <sub>240</sub> | 323.33  | 320.79  |
|           | C <sub>320</sub> | 399.70  | 400.58  |
|           | C <sub>500</sub> | 560.61  | 561.52  |

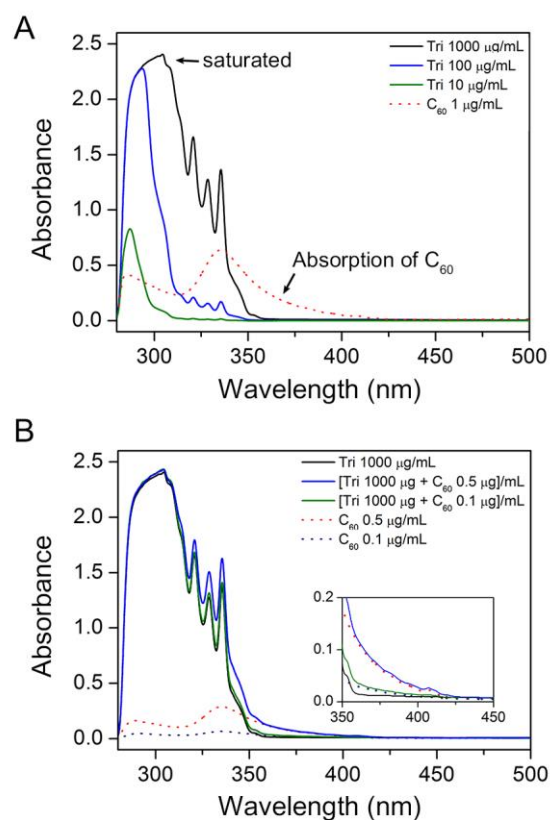

**Figure S4.** UV/Vis absorption spectra of triphenylene (Tri) precursor,  $\text{C}_{60}$  fullerene, and [Tri+ $\text{C}_{60}$ ] mixture for the examination of possible innate  $\text{C}_{60}$  constituents in Tri precursors. (A) The absorption spectra of Tri precursor and  $\text{C}_{60}$ .  $\text{C}_{60}$  has absorption at the wavelength range of 370-420 nm as previously reported by other groups,<sup>3,4</sup> whereas Tri precursor shows no absorption at this range. (B) The comparison of absorption spectra of Tri,  $\text{C}_{60}$ , and [Tri+ $\text{C}_{60}$ ] mixture. The same absorbance of  $\text{C}_{60}$  and [Tri+ $\text{C}_{60}$ ] at the wavelength range of 370-420 nm indicates that no  $\text{C}_{60}$  is included in the original Tri precursor.



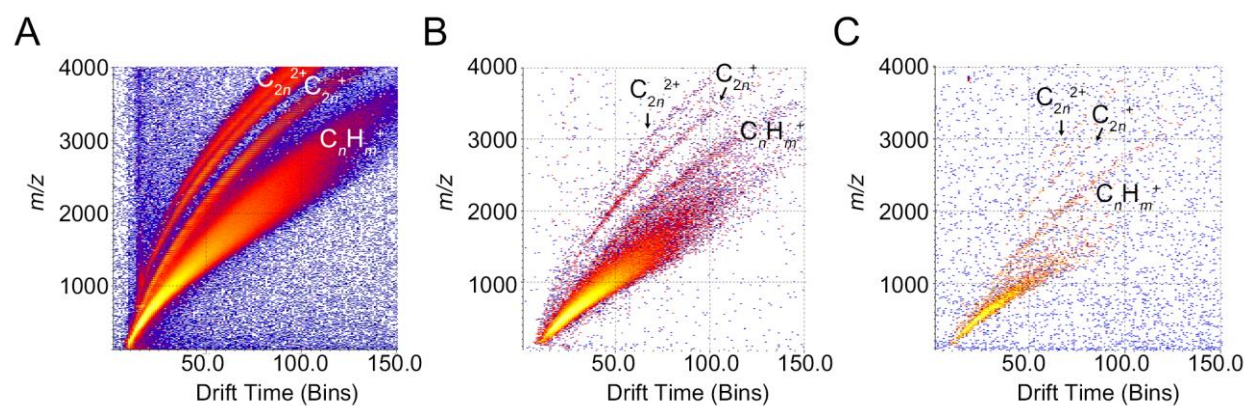

**Figure S5.** IM-MS spectra of ions generated from (A) triphenylene (Tri), (B) anthracene (Ath), and (C) phenanthrene (Phn). These IM-MS spectra show high abundance of hydrocarbons ( $C_n H_m^+$ ) and traces of carbon clusters ( $C_{2n}^+$  and  $C_{2n}^{2+}$ ).

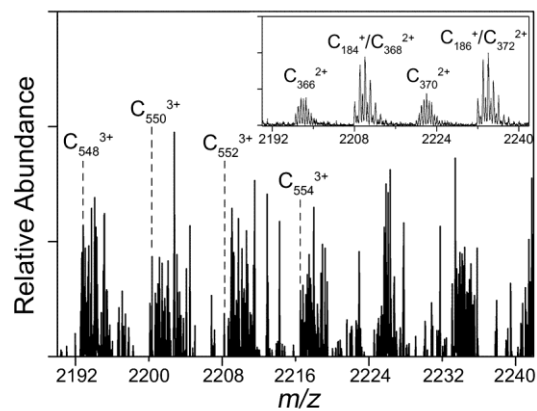

**Figure S6.** Mobility-separated mass spectrum of +3 charged carbon clusters from LDI mass spectrum of multi-layer graphene (MLG). Inset shows the original mass spectrum over identical  $m/z$  range.

## References

- (1) Blake, P.; Hill, E.; Neto, A. C.; Novoselov, K.; Jiang, D.; Yang, R.; Booth, T.; Geim, A. *Appl. Phys. Lett.* **2007**, *91*, 063124.
- (2) Ni, Z.; Wang, Y.; Yu, T.; Shen, Z. *Nano Res.* **2008**, *1*, 273.
- (3) Li, H.; Jia, X.; Li, Y.; Shi, X.; Hao, J. *J. Phys. Chem. B* **2006**, *110*, 68.
- (4) Chen, M.; Shen, W.; Bao, L.; Cai, W.; Xie, Y.; Akasaka, T.; Lu, X. *Eur. J. Org. Chem.* **2015**, *26*, 5742.
